# Supplementary material for: Dual function of the NDR-kinase Dbf2 in the regulation of the F-BAR protein Hof1 during cytokinesis
Source: PubMed Central journal article supplement — Mol Biol Cell. 2013 May 1;24(9):1290–304. doi: 10.1091/mbc.E12-08-0608 (PMC3639042; doi:10.1091/mbc.e12-08-0608), 2013-05-01

**Figure S1. Phosphorylation of S533 and S563 by Dbf2-Mob1 is essential in the absence of Cyk3.**

A) Genetic interactions of the indicated genotypes. Cells contain an *URA3* based plasmid carrying wild type *CYK3* and were grown in glucose (2%) containing medium at 23°C. Serial dilutions were spotted onto glucose (2%) containing plates without or with 5-FOA, which selects against the wild type *CYK3* containing *URA3* plasmid. Plates were incubated at 23°C.

B) Kinase assay show the *in vitro* phosphorylation of Hof1-(aa521-586), Hof1-(aa521-586)-S533A and Hof1-(aa521-586)-S563A by Dbf2-Mob1.

C) Quantification of (B). See material and methods for details.

**Figure S2. Chs2 and Inn1 are stabilized at the cell division site in *hof1-4A* upon depletion of *CYK3*.**

A-B) Localization of Inn1-GFP and Chs2-GFP after overexpression (galactose, Gal) or repression (glucose, Glu) of pGal1-*CYK3* in *HOF1*, *hof1-4A*, *hof1-4E* mutants. Immunoblots show Inn1-GFP, Chs2-GFP and 3HA-Cyk3 levels after overexpression and repression of pGal1-3HA-*CYK3*. Scale bars 5µm.

**Table S1. Yeast strains used in this study**

|         |                                                                                                             |                          |
|---------|-------------------------------------------------------------------------------------------------------------|--------------------------|
| ESM356  | MATa <i>ura3-52 leu2Δ1 his3Δ200 trp1Δ63</i>                                                                 | (Pereira et al., 2001)*  |
| MFY289  | ESM356 <i>hof1-4A-GFP-hphNT1</i>                                                                            | this study               |
| MFY572  | YPH499 <i>hof1-4A-GFP-hphNT1 Δcyk3::HIS3MX6 pRS316-CYK3</i>                                                 | this study               |
| MFY577  | ESM356 <i>hof1-4E-GFP-hphNT1</i>                                                                            | this study               |
| MFY622  | ESM356 <i>hof1-4A-GFP-hphNT1 natNT1-Gal1-3HA-CYK3</i>                                                       | this study               |
| MFY623  | ESM356 <i>hof1-4E-GFP-hphNT1 natNT1-Gal1-3HA-CYK3</i>                                                       | this study               |
| MFY1061 | ESM356 <i>dbf2-2 dbf20Δ::HIS3MX6 HOF1-GFP-hphNT1 SHS1-Cherry-kanMX6</i>                                     | (Meitinger et al., 2011) |
| MFY1062 | ESM356 <i>dbf2-2 dbf20Δ::HIS3MX6 hof1-4E-GFP-hphNT1 SHS1-Cherry-kanMX6</i>                                  | this study               |
| MFY1113 | ESM356 <i>dbf2-2 dbf20Δ::HIS3MX6 HOF1-GFP-hphNT1 CDC10-TAP-kanMX6</i>                                       | this study               |
| MFY1126 | ESM356 <i>HOF1-GFP-hphNT1</i>                                                                               | this study               |
| MFY1136 | ESM356 <i>hof1-W637A-GFP-hphNT1</i>                                                                         | this study               |
| MFY1138 | ESM356 <i>dbf2-2 dbf20Δ::HIS3MX6 ura3-52::Yiplac211-Gal1-SIC1 (T5V, T33V, S76A)-HA hof1-4E-GFP-hphNT1</i>   | (Meitinger et al., 2011) |
| MFY1143 | ESM356 <i>dbf2-2 dbf20Δ::HIS3MX6 HOF1-3HA-TRP1 CDC10-TAP-kanMX6</i>                                         | this study               |
| MFY1144 | ESM356-1, <i>dbf2-2 dbf20Δ::HIS3MX6 hof1-4E-3HA-TRP1 CDC10-TAP-kanMX6</i>                                   | this study               |
| MFY1160 | ESM356 <i>hof1-4E-GFP-hphNT1 SHS1-Cherry-kanMX6</i>                                                         | (Meitinger et al., 2011) |
| MFY1164 | ESM356 <i>HOF1-GFP-hphNT1 SHS1-Cherry-kanMX6</i>                                                            | (Meitinger et al., 2011) |
| MFY1182 | ESM356 <i>Δhof11::HIS3MX6 SHS1-Cherry-kanMX6 ura3-52::URA3-Gal1-CLB2-ΔDB</i>                                | this study               |
| MFY1185 | ESM356 <i>hof1-4A-GFP-hphNT1 SHS1-Cherry-kanMX6 ura3-52::URA3-Gal1-CLB2-ΔDB</i>                             | (Meitinger et al., 2011) |
| MFY1186 | ESM356 <i>hof1-4E-GFP-hphNT1 SHS1-Cherry-kanMX6 ura3-52::URA3-Gal1-CLB2-ΔDB</i>                             | (Meitinger et al., 2011) |
| MFY1187 | ESM356 <i>hof1-W637A-GFP-hphNT1 SHS1-Cherry-kanMX6 ura3-52::URA3-Gal1-CLB2-ΔDB</i>                          | (Meitinger et al., 2011) |
| MFY1189 | ESM356 <i>HOF1-GFP-hphNT1 SHS1-Cherry-kanMX6 ura3-52::URA3-Gal1-CLB2-ΔDB</i>                                | (Meitinger et al., 2011) |
| MFY1237 | ESM356 <i>hof1-Δ2-299-GFP-hphNT1 SHS1-Cherry-kanMX6 ura3-52::URA3-Gal1-CLB2-ΔDB</i>                         | (Meitinger et al., 2011) |
| MFY1238 | ESM356 <i>hof1-Δ2-399-GFP-hphNT1 SHS1-Cherry-kanMX6 ura3-52::URA3-Gal1-CLB2-ΔDB</i>                         | this study               |
| MFY1271 | ESM356 <i>hof1-4A-GFP-hphNT1 natNT1-Gal1-3HA-CYK3 SHS1-Cherry-kanMX6</i>                                    | this study               |
| MFY1374 | YPH499 <i>hof1-4A-GFP-hphNT1 Δcyk3::HIS3MX6 pRS316-CYK3 Δcts1::TRP1</i>                                     | this study               |
| MFY1375 | YPH499 <i>hof1-4A-GFP-hphNT1 Δcyk3::HIS3MX6 pRS316-CYK3 Δegt2::TRP1</i>                                     | this study               |
| MFY1376 | YPH499 <i>hof1-4A-GFP-hphNT1 Δcyk3::HIS3MX6 pRS316-CYK3 Δdse2::TRP1</i>                                     | this study               |
| MFY1377 | YPH499 <i>hof1-4A-GFP-hphNT1 Δcyk3::HIS3MX6 pRS316-CYK3 Δscw11::TRP1</i>                                    | this study               |
| MFY1466 | ESM356 <i>hof1-S313E-GFP-hphNT1 SHS1-Cherry-kanMX6 ura3-52::URA3-Gal1-CLB2-ΔDB</i>                          | this study               |
| MFY1467 | ESM356 <i>hof1-S421E-GFP-hphNT1 SHS1-Cherry-kanMX6 ura3-52::URA3-Gal1-CLB2-ΔDB</i>                          | this study               |
| MFY1469 | ESM356 <i>hof1-S533E-S563E-GFP-hphNT1 SHS1-Cherry-kanMX6 ura3-52::URA3-Gal1-CLB2-ΔDB</i>                    | this study               |
| MFY1420 | ESM356 <i>dbf2-2 dbf20Δ::HIS3MX6 ura3-52::Yiplac211-Gal1-SIC1 (T5V, T33V, S76A)-HA hof1-313E-GFP-hphNT1</i> | this study               |
| MFY1433 | ESM356 <i>HOF1-GFP-hphNT1 natNT1-Gal1-3HA-CYK3</i>                                                          | this study               |
| MFY1472 | YPH499 <i>Δhof1::TRP1 pRS316-HOF1 Δcla4::HIS3MX6</i>                                                        | this study               |
| MFY1474 | YPH499 <i>Δhof1::TRP1 pRS316-HOF1 Δgin4::HIS3MX6</i>                                                        | this study               |
| MFY1475 | YPH499 <i>Δhof1::TRP1 pRS316-HOF1 Δkcc4::HIS3MX6</i>                                                        | this study               |
| MFY1476 | YPH499 <i>Δhof1::TRP1 pRS316-HOF1 Δrts1::HIS3MX6</i>                                                        | this study               |
| MFY1477 | YPH499 <i>Δhof1::TRP1 pRS316-HOF1 Δhsl1::HIS3MX6</i>                                                        | this study               |
| MFY1505 | YPH499 <i>Δhof1::TRP1 pRS316-HOF1 Δshs1::HIS3MX6</i>                                                        | this study               |
| MFY1868 | ESM356 <i>hof1-W637A-GFP-hphNT1 natNT1-Gal1-3HA-CYK3</i>                                                    | this study               |
| MFY1870 | ESM356 <i>hof1-4A-W637A-GFP-hphNT1 natNT1-Gal1-3HA-CYK3</i>                                                 | this study               |
| MFY2003 | YPH499 <i>Δhof1::TRP1 pRS316-HOF1 Δgin4::HIS3MX6 pRS315-HOF1 SHS1-GFP-hphNT</i>                             | this study               |
| MFY2004 | YPH499 <i>Δhof1::TRP1 pRS316-HOF1 Δgin4::HIS3MX6 pRS315-hof1-4A SHS1-GFP-hphNT</i>                          | this study               |
| MFY2005 | YPH499 <i>Δhof1::TRP1 pRS316-HOF1 Δgin4::HIS3MX6 pRS315-hof1-4E SHS1-GFP-hphNT</i>                          | this study               |
| MFY2007 | ESM356 <i>hof1-S313E-GFP-hphNT1 SHS1-Cherry-kanMX6</i>                                                      | this study               |
| MFY2008 | YPH499 <i>pRS316-HOF1 Δgin4::HIS3MX6 hof1-4A-GFP-hphNT</i>                                                  | this study               |
| MFY2009 | YPH499 <i>pRS316-HOF1 Δgin4::HIS3MX6 hof1-4E-GFP-hphNT</i>                                                  | this study               |
| MFY2010 | YPH499 <i>pRS316-HOF1 Δgin4::HIS3MX6 hof1-S313E-GFP-hphNT</i>                                               | this study               |

|         |                                                                                                                                         |                             |
|---------|-----------------------------------------------------------------------------------------------------------------------------------------|-----------------------------|
| MFY2011 | YPH499 pRS316- <i>HOF1</i> $\Delta$ <i>shs1::HIS3MX6 hof1-4A-GFP-hphNT</i>                                                              | this study                  |
| MFY2012 | YPH499 pRS316- <i>HOF1</i> $\Delta$ <i>shs1::HIS3MX6 hof1-4E-GFP-hphNT</i>                                                              | this study                  |
| MFY2013 | YPH499 pRS316- <i>HOF1</i> $\Delta$ <i>shs1::HIS3MX6 hof1-S313E-GFP-hphNT</i>                                                           | this study                  |
| MFY2084 | ESM356 <i>hof1-S533A-S563A-GFP-hphNT1 natNT1-Gal1-3HA-CYK3</i>                                                                          | this study                  |
| MFY2085 | ESM356 <i>hof1-S313A-GFP-hphNT1 natNT1-Gal1-3HA-CYK3</i>                                                                                | this study                  |
| MFY2086 | ESM356 <i>hof1-S517A-GFP-hphNT1 natNT1-Gal1-3HA-CYK3</i>                                                                                | this study                  |
| MFY2087 | ESM356 <i>hof1-S517A-W637A-GFP-hphNT1 natNT1-Gal1-3HA-CYK3</i>                                                                          | this study                  |
| MFY2088 | ESM356 <i>hof1-S533A-S563A-W637A-GFP-hphNT1 natNT1-Gal1-3HA-CYK3</i>                                                                    | this study                  |
| MFY2089 | ESM356 <i>hof1-<math>\Delta</math>2-279-GFP-hphNT1 SHS1-Cherry-kanMX6</i><br><i>ura3-52::URA3-Gal1-CLB2-<math>\Delta</math>DB</i>       | this study                  |
| MFY2090 | ESM356 <i>hof1-<math>\Delta</math>293-333-GFP-hphNT1 SHS1-Cherry-kanMX6</i><br><i>ura3-52::URA3-Gal1-CLB2-<math>\Delta</math>DB</i>     | this study                  |
| MFY2098 | ESM356 <i>hof1-<math>\Delta</math>2-279-S313E-GFP-hphNT1 SHS1-Cherry-kanMX6</i><br><i>ura3-52::URA3-Gal1-CLB2-<math>\Delta</math>DB</i> | this study                  |
| MFY2099 | ESM356 <i>hof1-S313E-W637A-GFP-hphNT1 SHS1-Cherry-kanMX6</i><br><i>ura3-52::URA3-Gal1-CLB2-<math>\Delta</math>DB</i>                    | this study                  |
| SGY37   | <i>MATa leu2 ADE2 ura3-52::URA3-lexA-op-LacZ his3 trp1</i>                                                                              | (Geissler et al., 1996)     |
| YPH499  | <i>MATa ura3-52 lys2-801 ade2-101 trp1<math>\Delta</math>63 his3<math>\Delta</math>200 leu2<math>\Delta</math>1</i>                     | (Sikorski and Hieter, 1989) |
| YPH500  | <i>MAT<math>\alpha</math> ura3-52 lys2-801 ade2-101 trp1<math>\Delta</math>63 his3<math>\Delta</math>200 leu2<math>\Delta</math>1</i>   | (Sikorski and Hieter, 1989) |

**Table S2. Plasmids used in this study**

|          |                                         |                             |
|----------|-----------------------------------------|-----------------------------|
| pBPE38-1 | pRS315- <i>HOF1</i>                     | (Meitinger et al., 2010)    |
| pDK028   | pRS425- <i>CHS2</i>                     | (Palani et al., 2012)       |
| pHA130   | pET28c- <i>HOF1-200-355</i>             | this study                  |
| pHA131   | pET28c- <i>HOF1-200-355-S313E</i>       | this study                  |
| pILM26   | pRS425- <i>INN1</i>                     | (Meitinger et al., 2010)    |
| pILM53   | pRS425- <i>CYK3</i>                     | (Palani et al., 2012)       |
| pMF056   | pRS316- <i>HOF1</i>                     | (Meitinger et al., 2010)    |
| pMF115-2 | pRS316- <i>hof1-4A-GFP-hphNT1</i>       | this study                  |
| pMF143   | pRS315- <i>hof1-4A</i>                  | this study                  |
| pMF193   | pRS315- <i>CYK3</i>                     | (Meitinger et al., 2011)    |
| pMF194   | pRS316- <i>CYK3</i>                     | this study                  |
| pMF205   | pRS315- <i>hof1-4E</i>                  | (Meitinger et al., 2011)    |
| pMF217   | pRS316- <i>hof1-4E-GFP-hphNT1</i>       | this study                  |
| pMF346   | pRS315- <i>hof1-S89A</i>                | this study                  |
| pMF347   | pRS315- <i>hof1-S313A</i>               | this study                  |
| pMF348   | pRS315- <i>hof1-S421A</i>               | this study                  |
| pMF349   | pRS315- <i>hof1-S533A</i>               | (Meitinger et al., 2011)    |
| pMF350-2 | pRS315- <i>hof1-S563A</i>               | (Meitinger et al., 2011)    |
| pMF355   | pRS315- <i>hof1-S533A-S563A</i>         | (Meitinger et al., 2011)    |
| pMF370   | pRS315- <i>hof1-S357A</i>               | this study                  |
| pMF371   | pRS315- <i>hof1-S444A</i>               | this study                  |
| pMF372   | pRS315- <i>hof1-S478A-S480A</i>         | this study                  |
| pMF419   | pRS316- <i>hof1-W637A-GFP-hphNT1</i>    | this study                  |
| pMF496   | pRS316- <i>hof1-S313E-GFP-hphNT1</i>    | this study                  |
| pMF690   | pRS316- <i>hof1-4A-W637A-GFP-hphNT1</i> | this study                  |
| pMF812   | pRS315-pGal1- <i>GFP-HOF1-293-355</i>   | this study                  |
| pMM5     | pRS423-pGal1-LexA-MYC                   | (Geissler et al., 1996)     |
| pMM6     | pRS425-pGal1-Gal4-HA                    | (Geissler et al., 1996)     |
| pRS306   | integration, <i>URA3</i>                | (Sikorski and Hieter, 1989) |
| pRS315   | <i>CEN, LEU2</i>                        | (Sikorski and Hieter, 1989) |
| pRS316   | <i>CEN, LEU2</i>                        | (Sikorski and Hieter, 1989) |
| pRS425   | 2 $\mu$ , <i>LEU2</i>                   | (Christianson et al., 1992) |
| pSP279   | pGEX-5X1- <i>HOF1-521-586</i>           | this study                  |
| pSP280   | pGEX-5X1- <i>HOF1-521-586-S533A</i>     | this study                  |
| pSP281   | pGEX-5X1- <i>HOF1-521-586-S563A</i>     | this study                  |

\* Table references:

- Christianson, T.W., R.S. Sikorski, M. Dante, J.H. Shero, and P. Hieter. 1992. Multifunctional yeast high-copy-number shuttle vectors. *Gene*. 110:119-122.
- Geissler, S., G. Pereira, A. Spang, M. Knop, S. Soues, J. Kilmartin, and E. Schiebel. 1996. The spindle pole body component Spc98p interacts with the gamma-tubulin-like Tub4p of *Saccharomyces cerevisiae* at the sites of microtubule attachment. *Embo J.* 15:3899-3911.
- Meitinger, F., M.E. Boehm, A. Hofmann, B. Hub, H. Zentgraf, W.D. Lehmann, and G. Pereira. 2011. Phosphorylation-dependent regulation of the F-BAR protein Hof1 during cytokinesis. *Genes Dev.* 25:875-888.
- Meitinger, F., B. Petrova, I.M. Lombardi, D.T. Bertazzi, B. Hub, H. Zentgraf, and G. Pereira. 2010. Targeted localization of Inn1, Cyk3 and Chs2 by the mitotic-exit network regulates cytokinesis in budding yeast. *J Cell Sci.* 123:1851-1861.

- Palani, S., F. Meitinger, M.E. Boehm, W.D. Lehmann, and G. Pereira. 2012. Cdc14-dependent dephosphorylation of Inn1 contributes to Inn1-Cyk3 complex formation. *J Cell Sci.*
- Pereira, G., T.U. Tanaka, K. Nasmyth, and E. Schiebel. 2001. Modes of spindle pole body inheritance and segregation of the Bfa1p-Bub2p checkpoint protein complex. *Embo J.* 20:6359-6370.
- Sikorski, R.S., and P. Hieter. 1989. A system of shuttle vectors and yeast host strains designed for efficient manipulation of DNA in *Saccharomyces cerevisiae*. *Genetics.* 122:19-27.

A

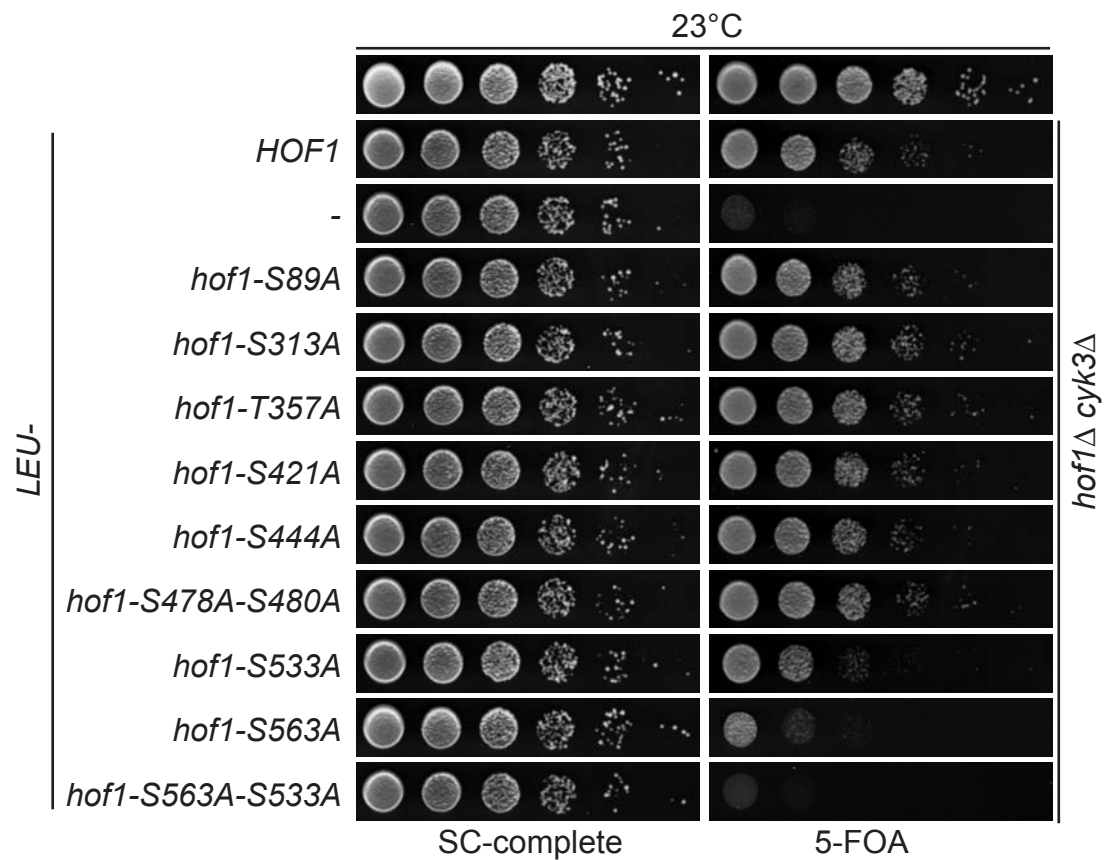

B

|                      | Dbf2-Mob1 | + | + | + | + |
|----------------------|-----------|---|---|---|---|
| GST-Hof1-(aa521-586) | WT        | - | + | - | - |
|                      | S533A     | - | - | + | - |
|                      | S563A     | - | - | - | + |
|                      | GST       | + | - | - | - |

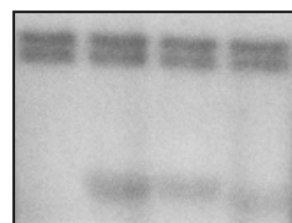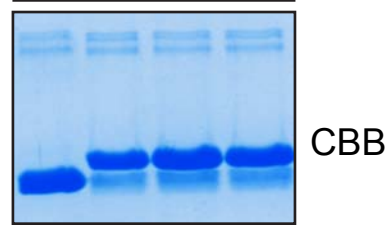

C

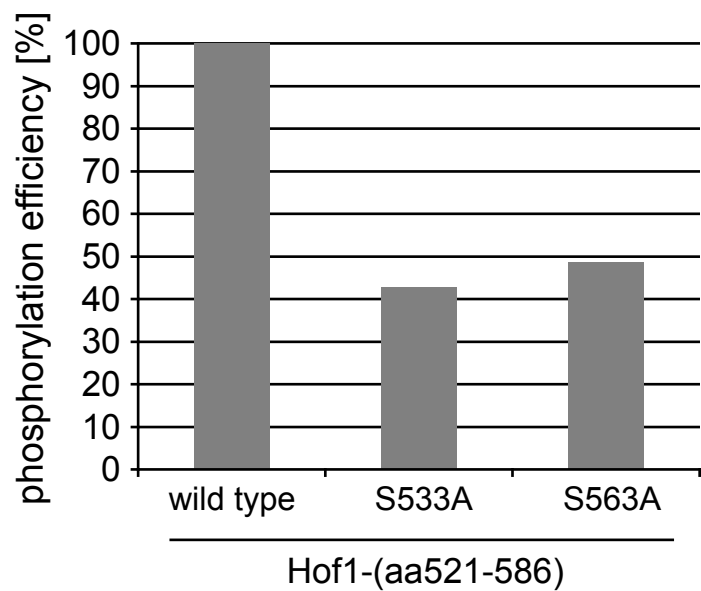

# Meitinger\_Figure\_S2

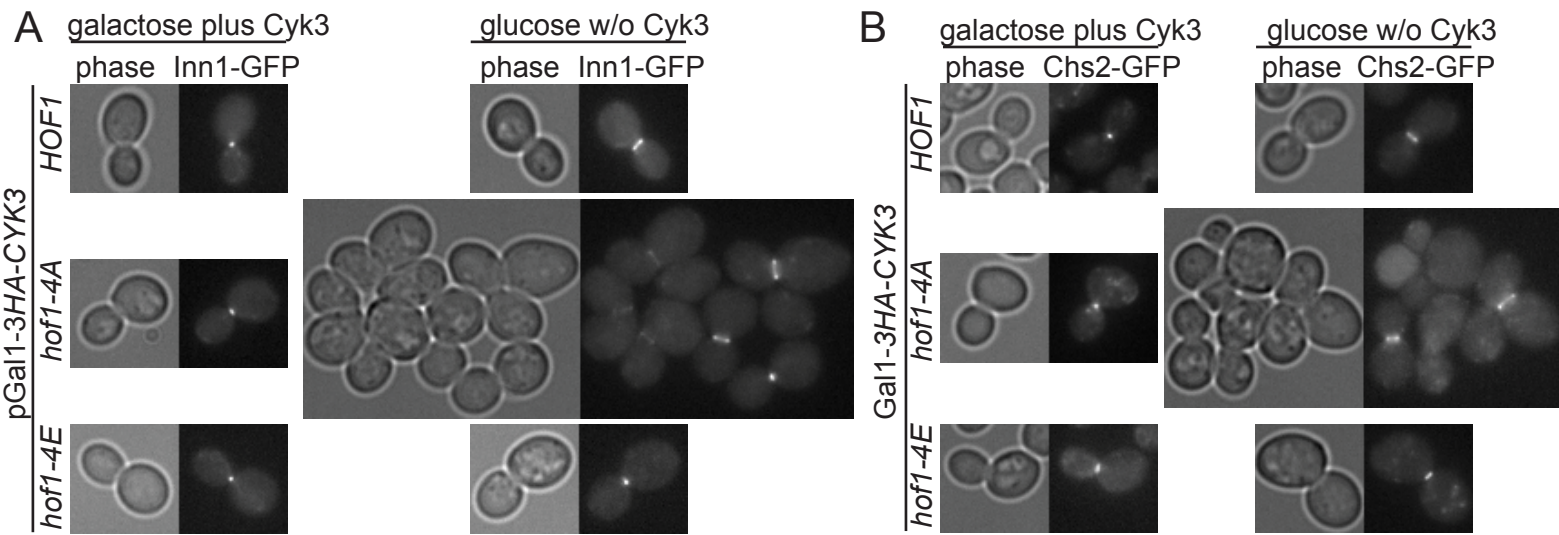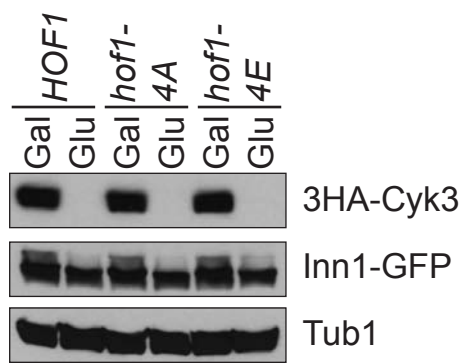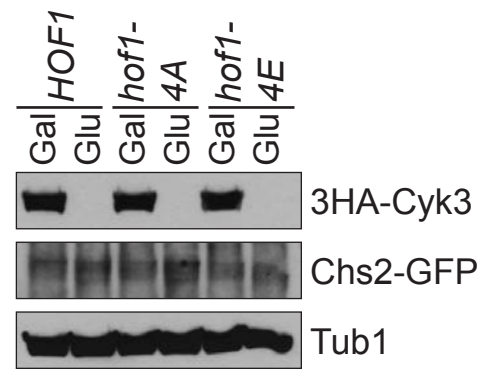

Supplement: supp_E12-08-0608_CombinedSupMats.pdf [file supp_E12-08-0608_CombinedSupMats.pdf]
